# Supplementary material for: Preclinical pharmacology of AZD9977: A novel mineralocorticoid receptor modulator separating organ protection from effects on electrolyte excretion
Source: PubMed Central journal article supplement (PMC5825103; doi:10.1371/journal.pone.0193380), 2018-02-23
Supplement: pone.0193380.s001.pdf [file pone.0193380.s001.pdf]

**S1 Table. Uni-nephrectomised rats on high salt diet and aldosterone infusion, general measures**

|                                            |       | <b>Vehicle</b><br><i>(n=7)</i> | <b>AZD9977</b><br><b>10 mg kg<sup>-1</sup> d<sup>-1</sup></b><br><i>(n=8)</i> | <b>AZD9977</b><br><b>30 mg kg<sup>-1</sup> d<sup>-1</sup></b><br><i>(n=8)</i> | <b>AZD9977</b><br><b>100 mg kg<sup>-1</sup> d<sup>-1</sup></b><br><i>(n=7)</i> | <b>eplerenone</b><br><b>10 mg kg<sup>-1</sup> d<sup>-1</sup></b><br><i>(n=8)</i> | <b>eplerenone</b><br><b>30 mg kg<sup>-1</sup> d<sup>-1</sup></b><br><i>(n=7)</i> |
|--------------------------------------------|-------|--------------------------------|-------------------------------------------------------------------------------|-------------------------------------------------------------------------------|--------------------------------------------------------------------------------|----------------------------------------------------------------------------------|----------------------------------------------------------------------------------|
| <b>BW (g)</b>                              | start | 365 ± 8                        | 361 ± 8                                                                       | 363 ± 5                                                                       | 365 ± 8                                                                        | 361 ± 4                                                                          | 361 ± 5                                                                          |
|                                            | end   | 513 ± 14                       | 505 ± 11                                                                      | 514 ± 13                                                                      | 516 ± 20                                                                       | 519 ± 14                                                                         | 520 ± 15                                                                         |
| <b>UACR</b><br><b>(µg mg<sup>-1</sup>)</b> | start | 15 ± 2                         | 20 ± 7                                                                        | 13 ± 3                                                                        | 13 ± 2                                                                         | 11 ± 2                                                                           | 10 ± 2                                                                           |
|                                            | 2w    | 7402 ± 2109                    | 2133 ± 705 *                                                                  | 1200 ± 569 *                                                                  | 148 ± 34 *                                                                     | 408 ± 173 *                                                                      | 88 ± 23 *                                                                        |
|                                            | end   | 10027 ± 1704                   | 5604 ± 689 *                                                                  | 3076 ± 756 *                                                                  | 900 ± 83 *                                                                     | 1689 ± 394 *                                                                     | 456 ± 66 *                                                                       |
| <b>u-Na<sup>+</sup>/K<sup>+</sup></b>      | end   | 2.27 ± 0.04                    | 2.34 ± 0.04                                                                   | 2.53 ± 0.04*                                                                  | 2.71 ± 0.05*                                                                   | 2.51 ± 0.05*                                                                     | 2.77 ± 0.03*                                                                     |
| <b>u-Na<sup>+</sup> (mmol/24h)</b>         | end   | 26.2 ± 1.2                     | 23.8 ± 1.0                                                                    | 26.6 ± 0.9                                                                    | 24.7 ± 1.1                                                                     | 25.4 ± 1.1                                                                       | 26.7 ± 0.9                                                                       |
| <b>u-K<sup>+</sup> (mmol/24h)</b>          | end   | 11.6 ± 0.6                     | 10.2 ± 0.4                                                                    | 10.6 ± 0.5                                                                    | 9.2 ± 0.5 *                                                                    | 10.1 ± 0.5                                                                       | 9.6 ± 0.3 *                                                                      |
| <b>p-K<sup>+</sup> (mM)</b>                | end   | 4.8 ± 0.2                      | 4.9 ± 0.2                                                                     | 5.0 ± 0.3                                                                     | 5.2 ± 0.1                                                                      | 4.8 ± 0.2                                                                        | 5.1 ± 0.2                                                                        |
| <b>FE K<sup>+</sup> (%)</b>                | end   | 33.9 ± 2.2                     | 28.0 ± 2.6                                                                    | 27.2 ± 1.2*                                                                   | 20.1 ± 0.7*                                                                    | 25.0 ± 1.3*                                                                      | 23.0 ± 1.0*                                                                      |
| <b>p-crea (µg mL<sup>-1</sup>)</b>         | end   | 3.5 ± 0.2                      | 3.4 ± 0.3                                                                     | 3.4 ± 0.2                                                                     | 2.9 ± 0.1                                                                      | 2.9 ± 0.1                                                                        | 3.2 ± 0.2                                                                        |
| <b>WI (mL/24h)</b>                         | end   | 194 ± 13                       | 171 ± 14                                                                      | 159 ± 8                                                                       | 121 ± 10*                                                                      | 144 ± 7*                                                                         | 129 ± 6*                                                                         |
| <b>C<sub>ss, average</sub> (µM)</b>        |       |                                | 0.07 ± 0.01                                                                   | 0.17 ± 0.03                                                                   | 0.46 ± 0.06                                                                    | 0.09 ± 0.02                                                                      | 0.30 ± 0.09                                                                      |

BW: body weight; UACR: urinary albumine/creatinine ratio; u-Na<sup>+</sup>/K<sup>+</sup> : urine Na<sup>+</sup>/K<sup>+</sup> ratio; u-Na<sup>+</sup>: amount Na<sup>+</sup> excreted in urine over 24h; u-K<sup>+</sup>: amount K<sup>+</sup> excreted in urine over 24h; p-K<sup>+</sup>: plasma K<sup>+</sup>; FE K<sup>+</sup>: fractional K<sup>+</sup> excretion; p-crea: plasma creatinine; WI: water intake; C<sub>ss, average</sub>: estimated average drug exposure levels, unbound fraction in plasma (AZD9977 57%, eplerenone 66%) was used to convert C<sub>ss, average</sub> to free plasma levels. Average ± SEM. \* p<0.05 vs vehicle group.
