# Supplementary material for: Preclinical pharmacology of AZD9977: A novel mineralocorticoid receptor modulator separating organ protection from effects on electrolyte excretion
Source: PubMed Central journal article supplement (PMC5825103; doi:10.1371/journal.pone.0193380), 2018-02-23
Supplement: pone.0193380.s002.pdf [file pone.0193380.s002.pdf]

**S2 Table. Uni-nephrectomised db/db mice, general measures**

|                                       |     | <b>lean<br/>vehicle</b><br><br><b>(n=9)</b> | <b>obese<br/>w18</b><br><br><b>(n=10)</b> | <b>obese<br/>vehicle</b><br><br><b>(n=9)</b> | <b>obese<br/>AZD9977</b><br><br><b>(n=8)</b> | <b>obese<br/>eplerenone</b><br><br><b>(n=9)</b> | <b>obese<br/>enalapril</b><br><br><b>(n=9)</b> | <b>obese<br/>enalapril<br/>+ AZD9977</b><br><br><b>(n=7)</b> | <b>obese<br/>enalapril<br/>+ eplerenone</b><br><br><b>(n=9)</b> |
|---------------------------------------|-----|---------------------------------------------|-------------------------------------------|----------------------------------------------|----------------------------------------------|-------------------------------------------------|------------------------------------------------|--------------------------------------------------------------|-----------------------------------------------------------------|
| <b>BW (g)</b>                         | w18 | 27.9 ± 0.5                                  | 49.7 ± 2.5                                | 50.3 ± 2.2                                   | 48 ± 2.3                                     | 49.1 ± 2                                        | 47.5 ± 1.5                                     | 50.2 ± 2.2                                                   | 49.4 ± 2.1                                                      |
|                                       | w22 | 29.1 ± 0.5*                                 |                                           | 46.6 ± 2.5                                   | 41.4 ± 1.9                                   | 42.5 ± 1.8                                      | 39.3 ± 1.8                                     | 39.9 ± 2.3                                                   | 38.3 ± 3.5*                                                     |
| <b>BG (mM)</b>                        | w18 | 8.7 ± 0.5                                   | >29.4                                     | >29.4                                        | >29.4                                        | >29.4                                           | >29.4                                          | >29.4                                                        | >29.4                                                           |
|                                       | w22 | 9.1 ± 0.5                                   |                                           | >29.4                                        | >29.4                                        | >29.4                                           | >29.4                                          | >29.4                                                        | >29.4                                                           |
| <b>HbA1c (%)</b>                      | w18 | 4.7 ± 0.1                                   | >12                                       | >12                                          | >12                                          | >12                                             | >12                                            | >12                                                          | >12                                                             |
|                                       | w22 | 4.7 ± 0.1                                   |                                           | >12                                          | >12                                          | >12                                             | >12                                            | >12                                                          | >12                                                             |
| <b>UAE (µg 24h<sup>-1</sup>)</b>      | w18 | 3 ± 1                                       | 867 ± 155                                 | 907 ± 138                                    | 797 ± 169                                    | 892 ± 186                                       | 958 ± 184                                      | 1055 ± 296                                                   | 832 ± 129                                                       |
|                                       | w22 | 1 ± 0                                       |                                           | 1023 ± 175                                   | 588 ± 80 *                                   | 569 ± 76 *                                      | 583 ± 97 *                                     | 356 ± 52 *                                                   | 244 ± 51 *                                                      |
| <b>u-Na<sup>+</sup>/K<sup>+</sup></b> | end |                                             | 0.53 ± 0.01*                              | 0.39 ± 0.01                                  | 0.47 ± 0.01*                                 | 0.48 ± 0.02*                                    | 0.40 ± 0.01                                    | 0.47 ± 0.01*                                                 | 0.50 ± 0.02*                                                    |
| <b>u-Na<sup>+</sup> (mmol/24h)</b>    | end |                                             | 0.52 ± 0.04*                              | 0.37 ± 0.02                                  | 0.45 ± 0.05                                  | 0.40 ± 0.05                                     | 0.36 ± 0.03                                    | 0.39 ± 0.03                                                  | 0.39 ± 0.04                                                     |
| <b>u-K<sup>+</sup> (mmol/24h)</b>     | end |                                             | 0.98 ± 0.06                               | 0.94 ± 0.04                                  | 0.97 ± 0.10                                  | 0.85 ± 0.10                                     | 0.90 ± 0.07                                    | 0.84 ± 0.07                                                  | 0.80 ± 0.10                                                     |
| <b>p-K<sup>+</sup> (mM)</b>           | end | 3.2 ± 0.1                                   |                                           | 3.6 ± 0.1                                    | 3.9 ± 0.2                                    | 3.8 ± 0.1                                       | 4.4 ± 0.1*                                     | 4.8 ± 0.2*                                                   | 4.7 ± 0.3*                                                      |
| <b>FE K<sup>+</sup> (%)</b>           | end |                                             |                                           | 20.5 ± 1.2 <sup>#</sup>                      | 20.1 ± 0.9 <sup>#</sup>                      | 22.3 ± 1.0 <sup>#</sup>                         | 15.6 ± 0.4*                                    | 15.6 ± 0.8*                                                  | 17.8 ± 1.0                                                      |
| <b>FE Na<sup>+</sup> (%)</b>          | end |                                             |                                           | 0.19 ± 0.01                                  | 0.24 ± 0.01                                  | 0.27 ± 0.02*                                    | 0.18 ± 0.01                                    | 0.24 ± 0.02                                                  | 0.27 ± 0.02*                                                    |
| <b>p-crea (µg mL<sup>-1</sup>)</b>    | end | 9.9 ± 0.5*                                  | 5.1 ± 0.2                                 | 5.3 ± 0.3                                    | 5.8 ± 0.2                                    | 5.9 ± 0.2                                       | 5.0 ± 0.2                                      | 5.6 ± 0.3                                                    | 6.4 ± 0.6                                                       |
| <b>C<sub>drug</sub> (µM)</b>          |     |                                             |                                           |                                              | 0.35 ± 0.04                                  | 0.15 ± 0.02                                     |                                                | 0.27 ± 0.05                                                  | 0.12 ± 0.03                                                     |
| <b>Fold IC<sub>50</sub></b>           |     |                                             |                                           |                                              | 2.4                                          | 1.1                                             |                                                | 1.9                                                          | 0.9                                                             |

BW: body weight; BG: blood glucose; UAE: urinary albumine excretion; u-Na<sup>+</sup>/K<sup>+</sup> : urine Na<sup>+</sup>/K<sup>+</sup> ratio; u-Na<sup>+</sup>: amount Na<sup>+</sup> excreted in urine over 24h; u-K<sup>+</sup>: amount K<sup>+</sup> excreted in urine over 24h; p-K<sup>+</sup>: plasma K<sup>+</sup>; FE K<sup>+</sup>: fractional K<sup>+</sup> excretion; FE Na<sup>+</sup>: fractional Na<sup>+</sup> excretion; p-crea: plasma creatinine; C<sub>drug</sub>: terminal drug exposure levels. Unbound fraction in plasma (AZD9977 55%, eplerenone 69%) was used to convert C<sub>drug</sub> to free plasma levels; Fold IC<sub>50</sub>: free plasma levels related to *in vitro* potencies (free plasma levels / *in vitro* IC<sub>50</sub>). Average ± SEM. \*p<0.05 vs obese vehicle at w22, #p<0.05 vs enalapril.
