# Supplementary material for: Preclinical pharmacology of AZD9977: A novel mineralocorticoid receptor modulator separating organ protection from effects on electrolyte excretion
Source: PubMed Central journal article supplement (PMC5825103; doi:10.1371/journal.pone.0193380), 2018-02-23
Supplement: pone.0193380.s003.pdf [file pone.0193380.s003.pdf]

# S1 Fig. Individual electrolytes in acute testing

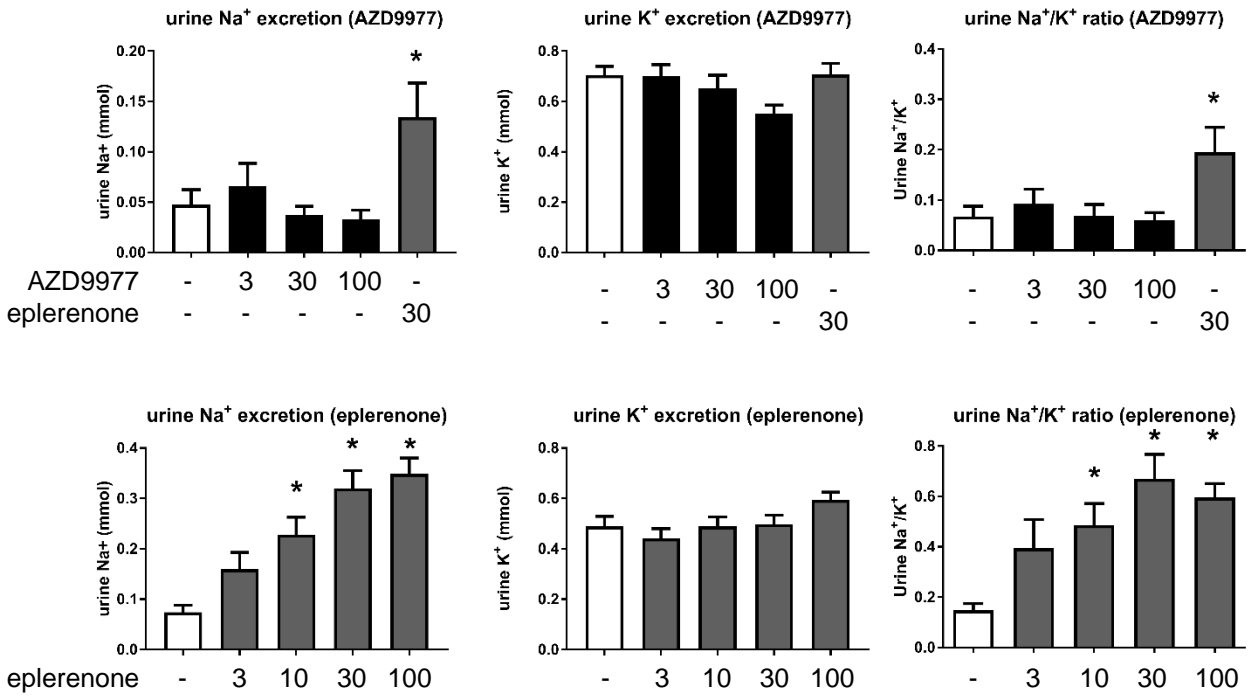

Excreted amounts of Na<sup>+</sup> and K<sup>+</sup> over 8 hrs. Salt deprived rats were treated with increasing doses of AZD9977 or eplerenone (mg kg<sup>-1</sup> as indicated), urine collection for 8 hours after dose. Average +/- SEM; n = 8; \*p < 0.05 compared to vehicle.
