# Supplementary material for: Preclinical pharmacology of AZD9977: A novel mineralocorticoid receptor modulator separating organ protection from effects on electrolyte excretion
Source: PubMed Central journal article supplement (PMC5825103; doi:10.1371/journal.pone.0193380), 2018-02-23
Supplement: pone.0193380.s004.pdf [file pone.0193380.s004.pdf]

## S2 Fig. Co-administration did not alter total exposures of either eplerenone or AZD9977

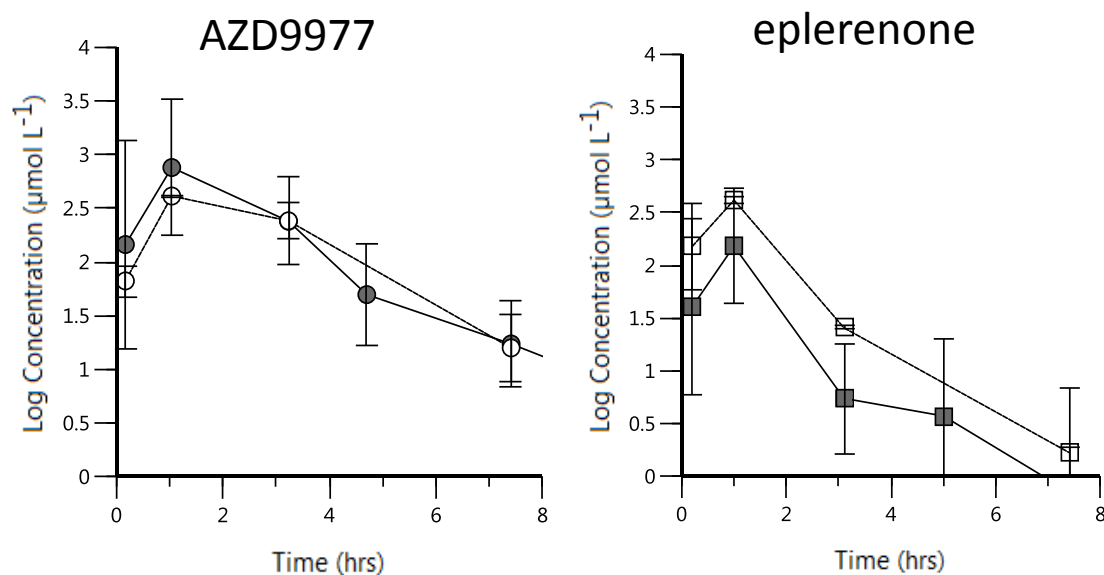

**Left graph:** AZD9977 concentration vs time after single oral dose administration of 100 mg kg<sup>-1</sup> AZD9977 (solid circles) or 100 mg kg<sup>-1</sup> AZD9977 plus 30 mg kg<sup>-1</sup> eplerenone (open circles).

**Right graph:** eplerenone concentration vs time after single oral dose administration of 30 mg kg<sup>-1</sup> eplerenone (solid squares) or 30 mg kg<sup>-1</sup> eplerenone plus 100 mg kg<sup>-1</sup> AZD9977 (open squares). Log Mean  $\pm$  log SD. N=2-9 per time point.

Co-administration did not alter total exposures of either eplerenone or AZD9977: when 100 mg kg<sup>-1</sup> AZD9977 was administered alone or co-administered with eplerenone 30 mg kg<sup>-1</sup> the median AUC<sub>0-8hrs</sub> for AZD9977 was 66 µM x hrs (25<sup>th</sup>; 75<sup>th</sup> percentile: 44;116) and 66 µM x hrs (25<sup>th</sup>; 75<sup>th</sup> percentile: 60; 72), respectively. When 30 mg kg<sup>-1</sup> eplerenone was administered alone or co-administered with AZD9977 100 mg kg<sup>-1</sup> the median AUC<sub>0-8hrs</sub> for eplerenone was 26 µM x hrs (25<sup>th</sup>; 75<sup>th</sup> percentile: 14;41), and 40 µM x hrs (25<sup>th</sup>; 75<sup>th</sup> percentile: 37; 43), respectively. AUC was calculated using a non-compartmental analysis with linear trapezoidal and linear interpolation method, as implemented in Phoenix® WinNonlin® version 6.4, NMLE version 1.3 (Certara USA, Inc., Princeton, NJ).
